# Supplementary material for: Reaction-contingency based bipartite Boolean modelling
Source: PubMed Central journal article supplement (PMC3710479; doi:10.1186/1752-0509-7-58), 2013-07-08
Supplement: 1752-0509-7-58-S1.pdf [file 1752-0509-7-58-S1.pdf]

| <b>1</b>    | Absolute contingencies only: !/x                  |                                   |                                | Change from               |                    |
|-------------|---------------------------------------------------|-----------------------------------|--------------------------------|---------------------------|--------------------|
|             |                                                   |                                   |                                | K+/K-                     |                    |
| <b>2</b>    | 50 new dephosphorylation reactions (See Table S2) |                                   |                                | new                       |                    |
| <b>3</b>    | ContingencyID                                     | Target                            | Contingency                    | Modifier                  |                    |
|             | 314                                               | Rom2_[DH]_GEF_Rho1_[GnP]          | !                              | [Turgor]                  | new                |
|             | 315                                               | Tus1_[DH]_GEF_Rho1_[GnP]          | !                              | [Turgor]                  | new                |
|             | 316                                               | Rom1_[DH]_GEF_Rho1_[GnP]          | !                              | [Turgor]                  | new                |
| <b>4</b>    | 93                                                | Ste11_[KD]_P+_Ste7_[AL(S359)]     | !                              | <Ste7-5-5-11>             | <Ste11-7>          |
|             | 94                                                | Ste11_[KD]_P+_Ste7_[AL(T363)]     | !                              | <Ste7-5-5-11>             | <Ste11-7>          |
|             | 194                                               | Ste20_[KD]_P+_Ste11_[CBD(S302)]   | 0                              | <FIL-signal>              | !                  |
|             | 195                                               | Ste20_[KD]_P+_Ste11_[CBD(S306)]   | 0                              | <FIL-signal>              | !                  |
|             | 196                                               | Ste20_[KD]_P+_Ste11_[CBD(T307)]   | 0                              | <FIL-signal>              | !                  |
|             | 261                                               | Msb2_[CyT]_ppi_Sho1_[CyT]         | 0                              | Msb2_[HMH/CD]-{Truncated} | !                  |
| <b>5</b>    | 317                                               | Bar1_[PepD]_DEG_MFalpha_[(L6-K7)] | !                              | [PRE-transcription]       | new                |
|             | Ste3 = False<br>MFalpha = True                    |                                   |                                |                           | True<br>False      |
| <b>6</b>    | 197                                               | Dig1_ppi_Ste12_[c]                | 0                              | Dig2--Ste12_[n/DBD]       | !                  |
|             | 198                                               | Dig1_ppi_Ste12_[c]                | 0                              | Kss1--Ste12               | !                  |
|             | 199                                               | Dig1_ppi_Ste12_[c]                | 0                              | Fus3--Ste12               | !                  |
|             | 200                                               | Dig2_ppi_Ste12_[n/DBD]            | 0                              | Dig1--Ste12_[c]           | !                  |
|             |                                                   |                                   | Sho1_[CyT]_ppi_Ste11_[BD:Sho1] | 0                         | Ste5_[MEKK]--Ste11 |
| <b>8</b>    | ReactionID                                        | ComponentA[Name]                  | Reaction                       | ComponentB[Name]          |                    |
|             | 273                                               | ukProtease1                       | DEG                            | Tec1                      | new                |
|             | ContingencyID                                     | Target                            | Contingency                    | Modifier                  |                    |
|             | 318                                               | ukProtease1_DEG_Tec1              | !                              | Tec1-{Ub}                 | new                |
| Tec1 = True |                                                   |                                   |                                | False                     |                    |

**Table 1**
