# Supplementary material for: Reaction-contingency based bipartite Boolean modelling
Source: PubMed Central journal article supplement (PMC3710479; doi:10.1186/1752-0509-7-58), 2013-07-08
Supplement: 1752-0509-7-58-S4.pdf [file 1752-0509-7-58-S4.pdf]

| L                | M                  | N                     | O                   | P-       | Q                | R                  | S                     | T                   |
|------------------|--------------------|-----------------------|---------------------|----------|------------------|--------------------|-----------------------|---------------------|
| ComponentA[Name] | ComponentA[Domain] | ComponentA[Subdomain] | ComponentA[Residue] | Reaction | ComponentB[Name] | ComponentB[Domain] | ComponentB[Subdomain] | ComponentB[Residue] |
| ukPPase1         |                    |                       |                     | P-       | Sst2             |                    |                       | S539                |
| ukPPase2         |                    |                       |                     | P-       | Ste5             |                    |                       |                     |
| ukPPase3         |                    |                       |                     | P-       | Pkc1             | AL                 |                       | T983                |
| ukPPase4         |                    |                       |                     | P-       | Msg5             |                    |                       |                     |
| ukPPase5         |                    |                       |                     | P-       | Rlm1             | c                  |                       | S427                |
| ukPPase6         |                    |                       |                     | P-       | Rlm1             | c                  |                       | T439                |
| ukPPase7         |                    |                       |                     | P-       | Sir3             |                    |                       | S275                |
| ukPPase8         |                    |                       |                     | P-       | Swi4             |                    |                       |                     |
| ukPPase9         |                    |                       |                     | P-       | Swi6             |                    |                       | S238                |
| ukPPase10        |                    |                       |                     | P-       | Rck2             | c                  |                       | S519                |
| ukPPase11        |                    |                       |                     | P-       | Sic1             |                    |                       | T173                |
| ukPPase12        |                    |                       |                     | P-       | Sko1             | n                  |                       | S108                |
| ukPPase13        |                    |                       |                     | P-       | Sko1             | n                  |                       | S113                |
| ukPPase14        |                    |                       |                     | P-       | Sko1             | n                  |                       | S126                |
| ukPPase15        |                    |                       |                     | P-       | Rck2             | Ser                |                       |                     |
| ukPPase16        |                    |                       |                     | P-       | Pbs2             | AL                 |                       | S514                |
| ukPPase17        |                    |                       |                     | P-       | Pbs2             | AL                 |                       | T518                |
| ukPPase18        |                    |                       |                     | P-       | Ssk2             |                    |                       | T1460               |
| ukPPase19        |                    |                       |                     | P-       | Ste11            | CBD                |                       | S302                |
| ukPPase20        |                    |                       |                     | P-       | Ste11            | CBD                |                       | S306                |
| ukPPase21        |                    |                       |                     | P-       | Ste11            | CBD                |                       | T307                |
| ukPPase22        |                    |                       |                     | P-       | Ssk1             | RR                 |                       | D544                |
| ukPPase23        |                    |                       |                     | P-       | Dig1             |                    |                       |                     |
| ukPPase24        |                    |                       |                     | P-       | Dig2             |                    |                       |                     |
| ukPPase25        |                    |                       |                     | P-       | Far1             |                    |                       | T306                |
| ukPPase26        |                    |                       |                     | P-       | Ste12            |                    |                       |                     |
| ukPPase27        |                    |                       |                     | P-       | Ste7             |                    |                       |                     |
| ukPPase28        |                    |                       |                     | P-       | Tec1             |                    |                       | T273                |
| ukPPase29        |                    |                       |                     | P-       | Ste7             | AL                 |                       | S359                |
| ukPPase30        |                    |                       |                     | P-       | Ste7             | AL                 |                       | T363                |
| ukPPase31        |                    |                       |                     | P-       | Ste20            | SerThr             |                       |                     |
| ukPPase32        |                    |                       |                     | P-       | Bck1             |                    |                       | S939                |
| ukPPase33        |                    |                       |                     | P-       | Smp1             |                    |                       | S348                |
| ukPPase34        |                    |                       |                     | P-       | Smp1             |                    |                       | S357                |
| ukPPase35        |                    |                       |                     | P-       | Smp1             |                    |                       | T365                |
| ukPPase36        |                    |                       |                     | P-       | Smp1             |                    |                       | S376                |
| ukPPase37        |                    |                       |                     | P-       | Hot1             |                    |                       | S30                 |
| ukPPase38        |                    |                       |                     | P-       | Hot1             |                    |                       | S70                 |
| ukPPase39        |                    |                       |                     | P-       | Hot1             |                    |                       | S153                |
| ukPPase40        |                    |                       |                     | P-       | Hot1             |                    |                       | S360                |
| ukPPase41        |                    |                       |                     | P-       | Hot1             |                    |                       | S410                |
| ukPPase42        |                    |                       |                     | P-       | Rom2             |                    |                       |                     |
| ukPPase43        |                    |                       |                     | P-       | Mkk1             |                    |                       | S377                |
| ukPPase44        |                    |                       |                     | P-       | Mkk1             |                    |                       | T381                |
| ukPPase45        |                    |                       |                     | P-       | Mkk2             |                    |                       | S370                |
| ukPPase46        |                    |                       |                     | P-       | Mkk2             |                    |                       | T374                |
| ukPPase47        |                    |                       |                     | P-       | Sir3             |                    |                       | S282                |
| ukPPase48        |                    |                       |                     | P-       | Sir3             |                    |                       | S289                |
| ukPPase49        |                    |                       |                     | P-       | Sir3             |                    |                       | S295                |
| ukPPase50        |                    |                       |                     | P-       | Tec1             |                    |                       | T276                |

**Table S3**
